# Supplementary material for: Global analysis of the AP2/ERF gene family in rose (Rosa chinensis) genome unveils the role of RcERF099 in Botrytis resistance
Source: PubMed Central journal article supplement (PMC7684944; doi:10.1186/s12870-020-02740-6), 2020-11-23
Supplement: 12870_2020_2740_MOESM2_ESM.pdf [file 12870_2020_2740_MOESM2_ESM.pdf]

Supplemental Figure S1 Melting curves for each gene and control :RcERF023

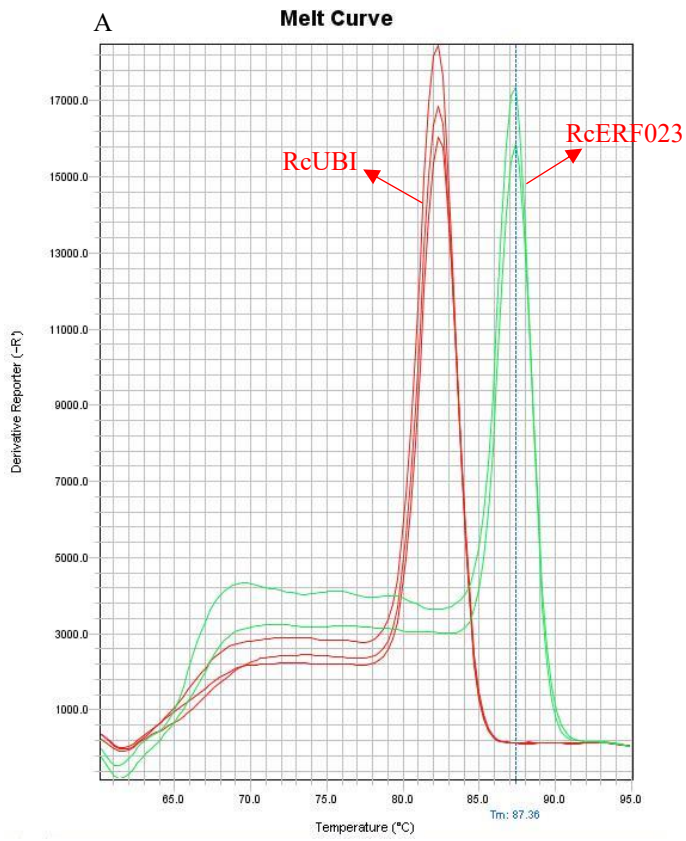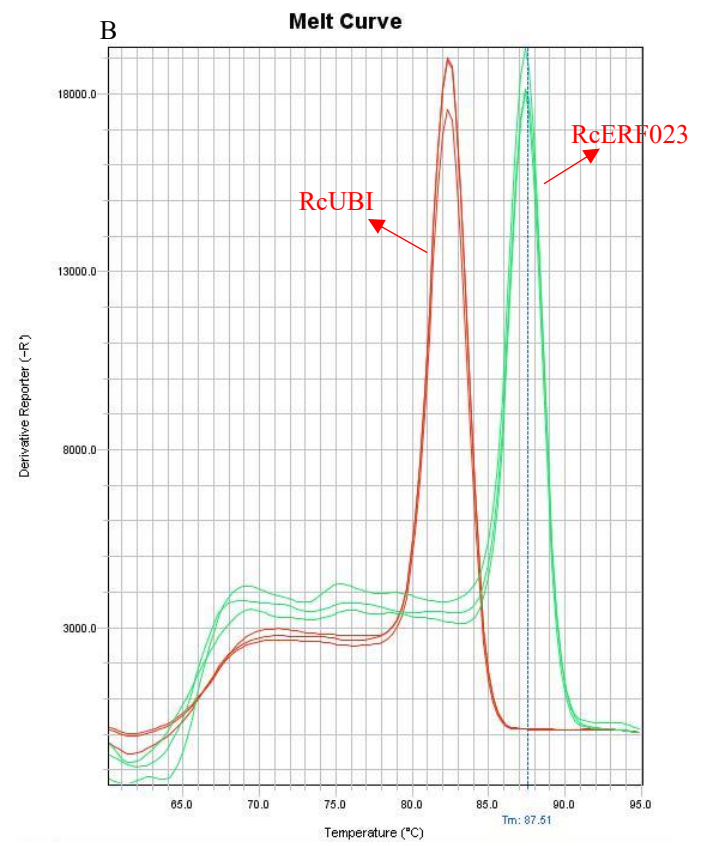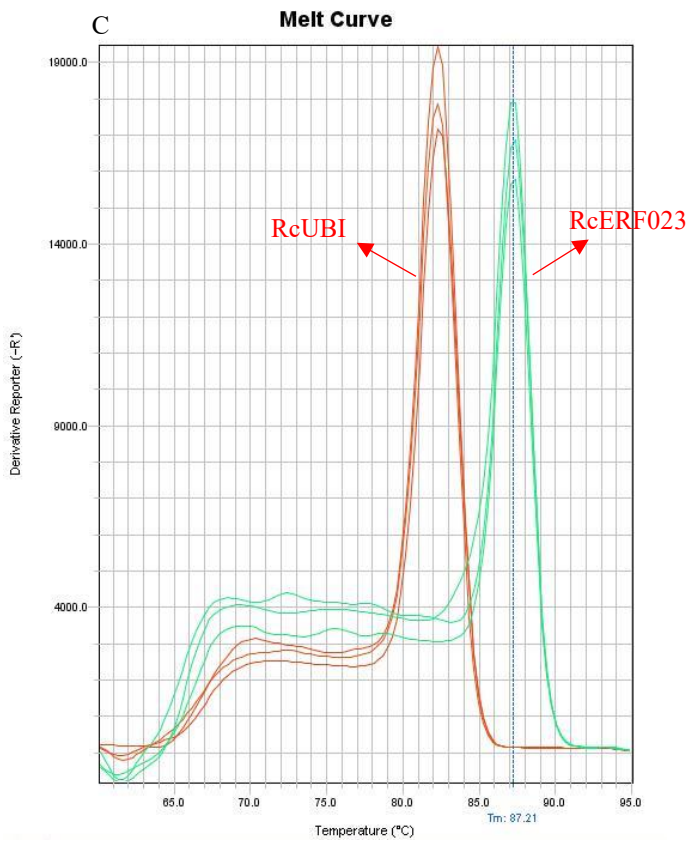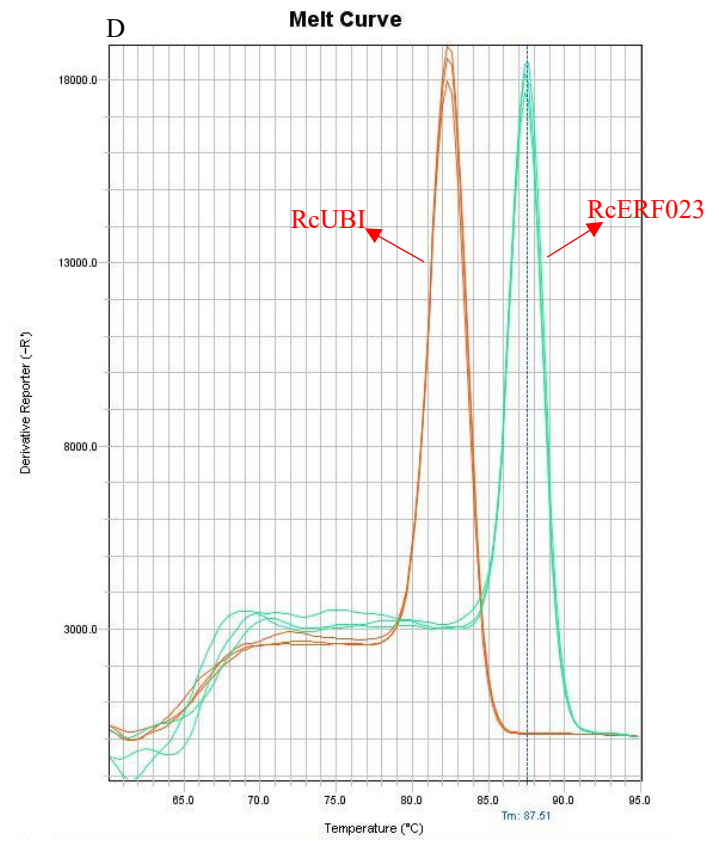

A:30h-PDB

B: 30h-BC

C: 48h-PDB

D:30h-BC

Supplemental Figure S1 Melting curves for each gene and control: RcERF064

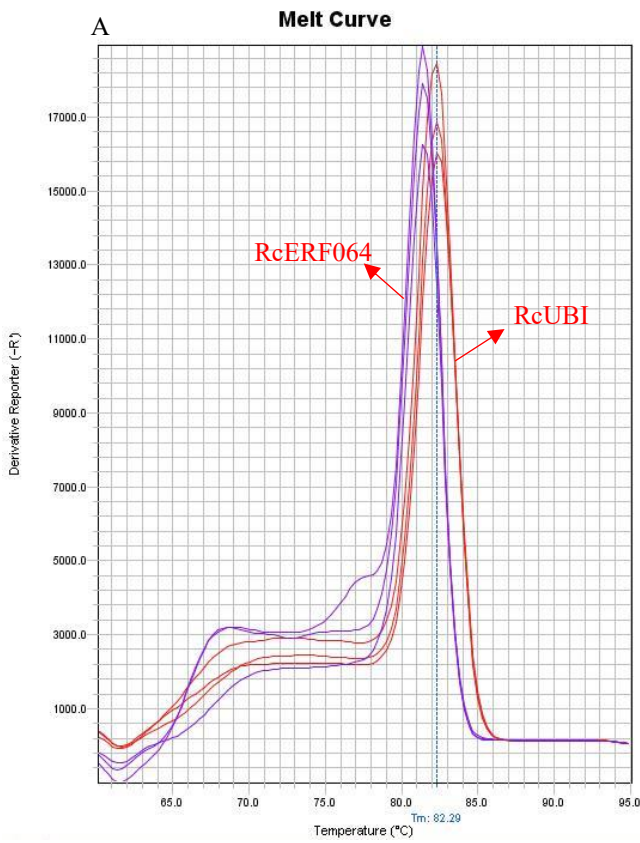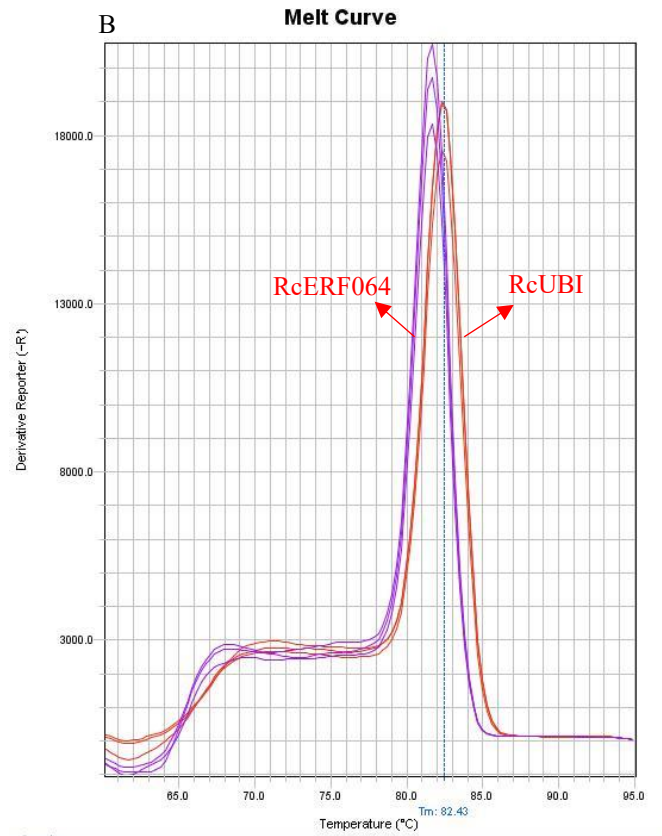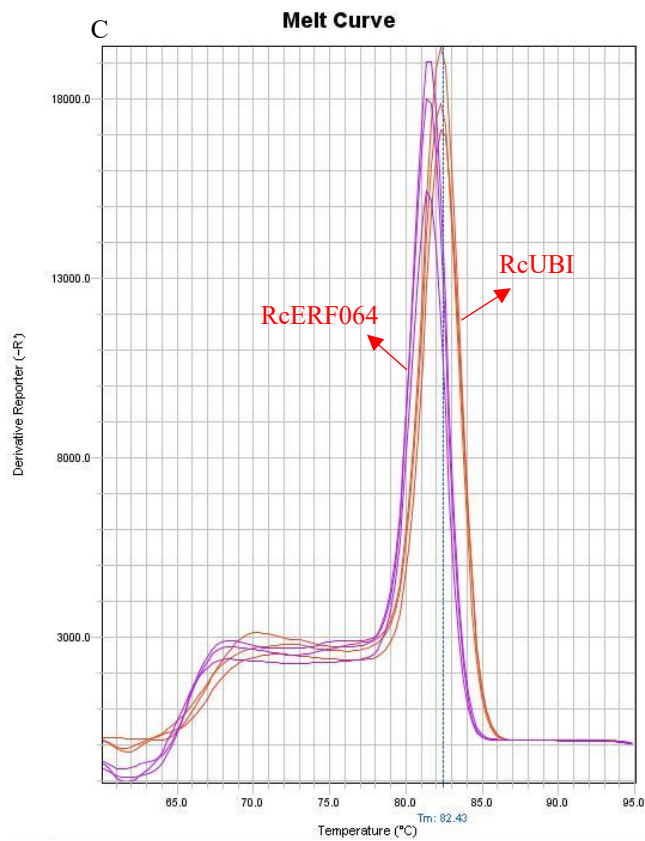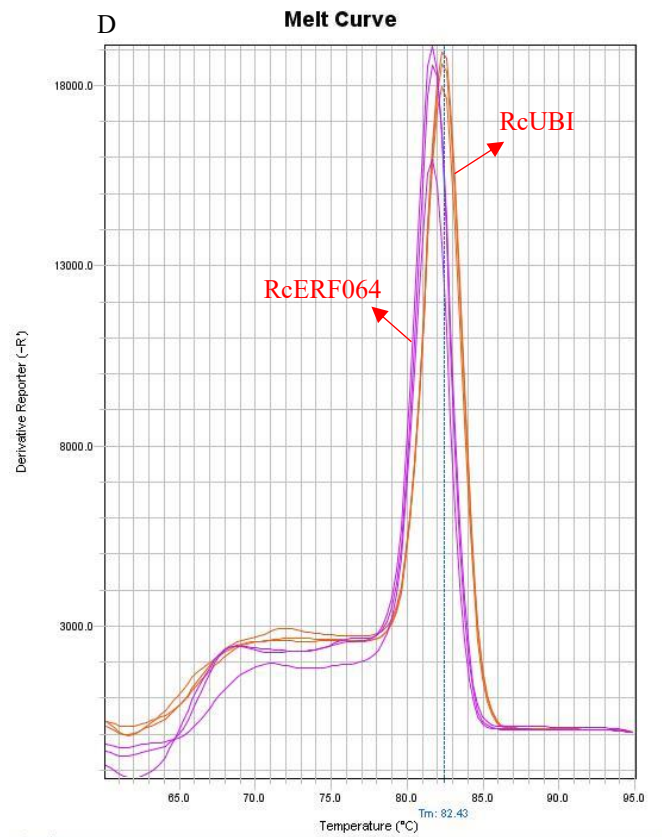

A:30h-PDB

B: 30h-BC

C: 48h-PDB

D:30h-BC

Supplemental Figure S1 Melting curves for each gene and control: RcERF068

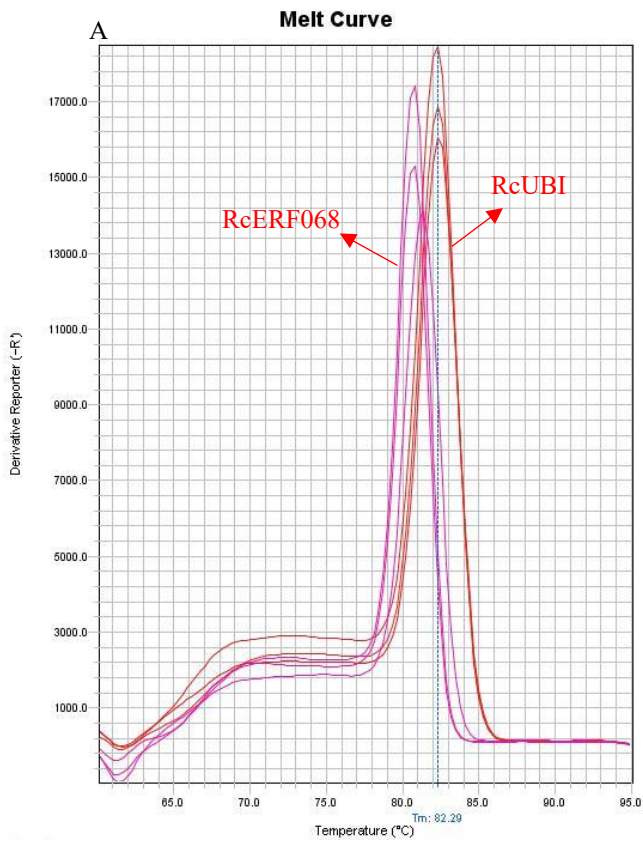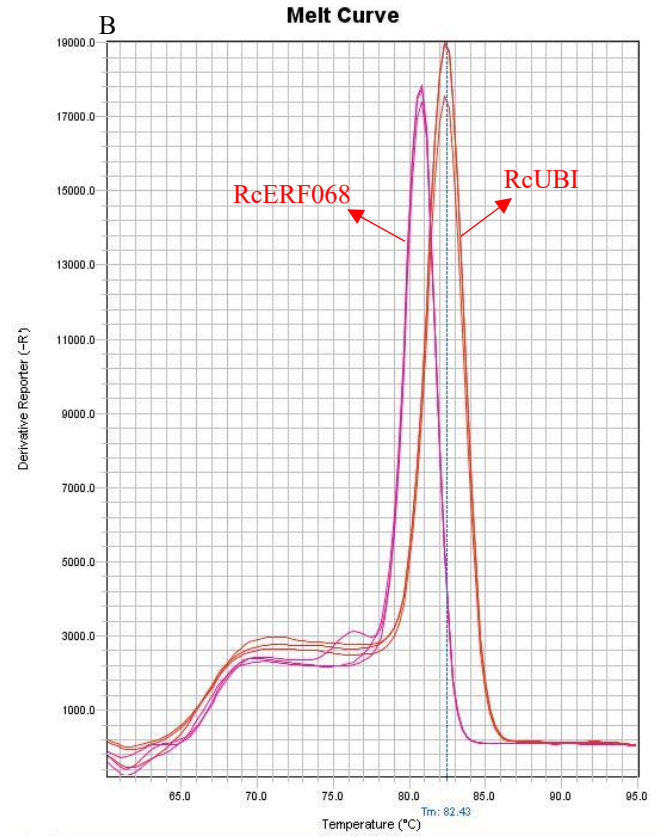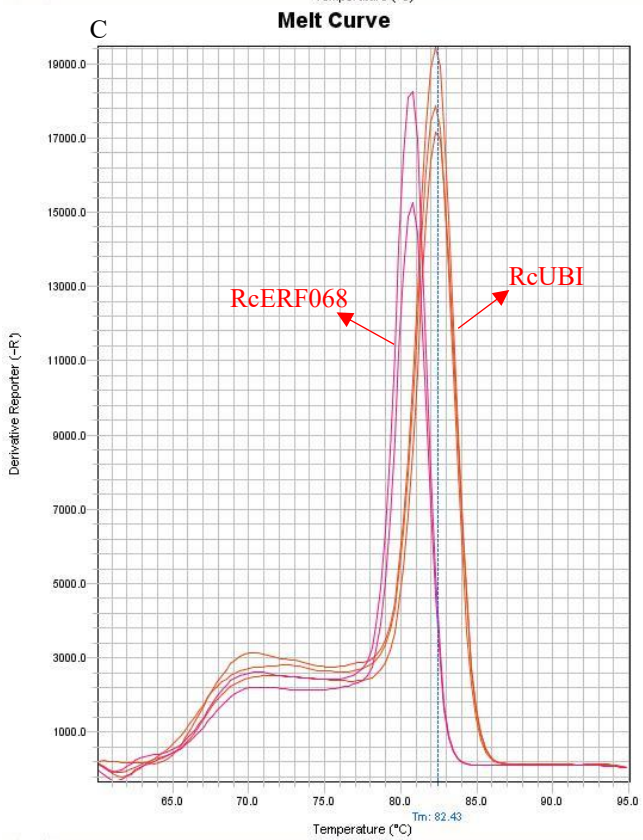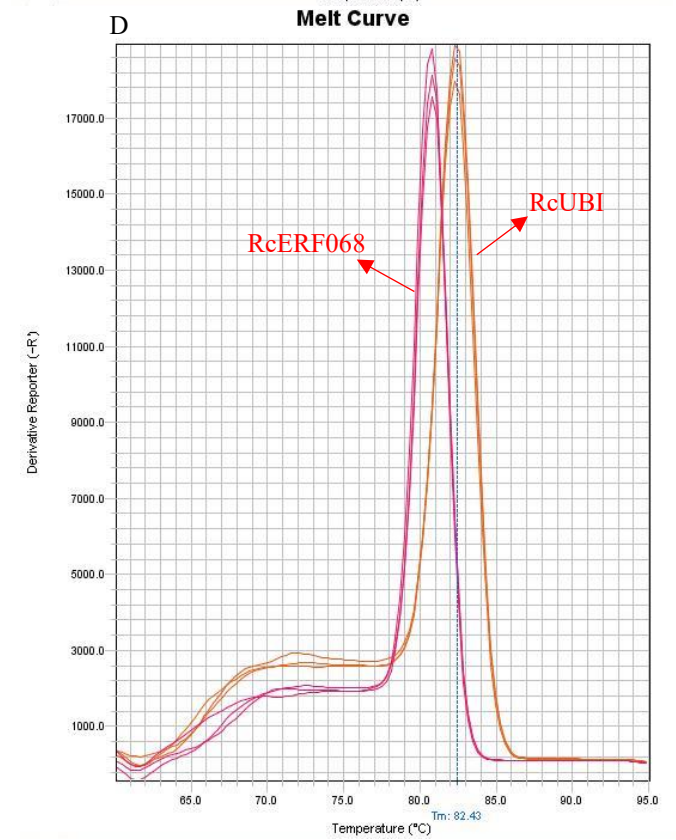

A:30h-PDB

B: 30h-BC

C: 48h-PDB

D:30h-BC



Supplemental Figure S1 Melting curves for each gene and control: RcERF093

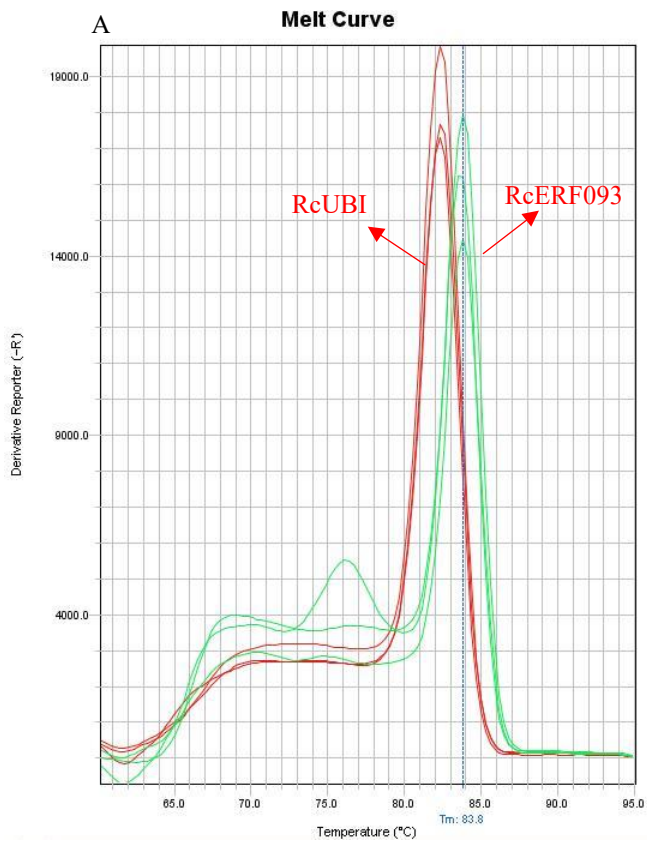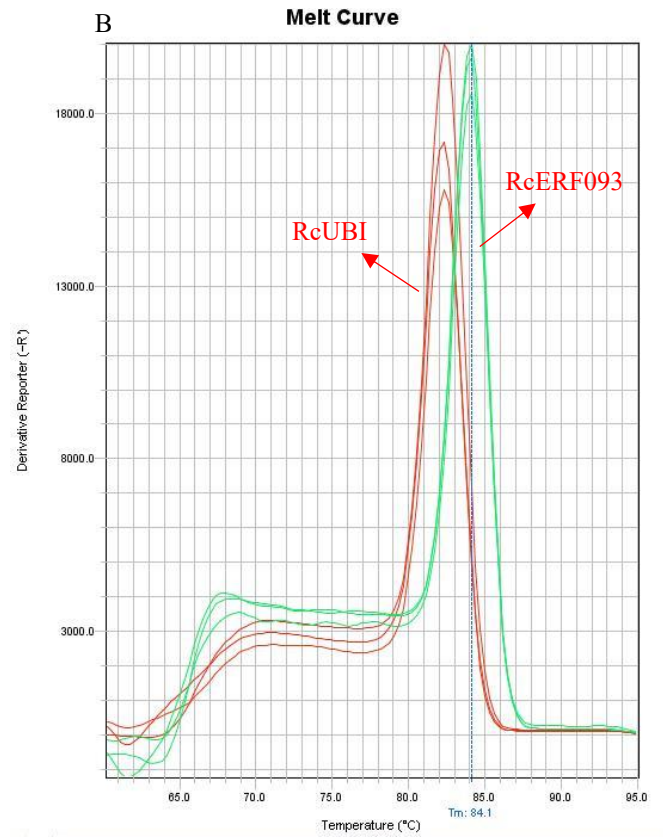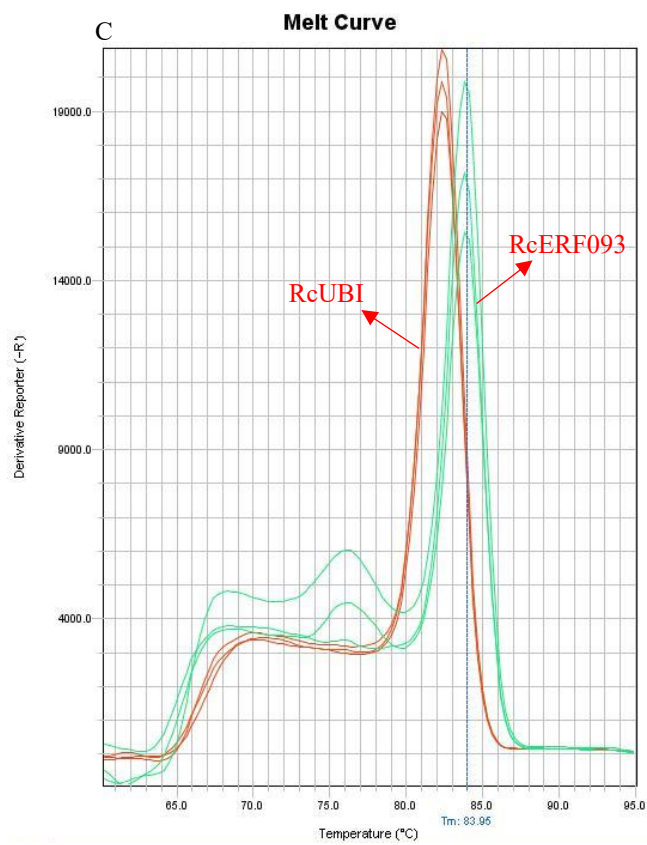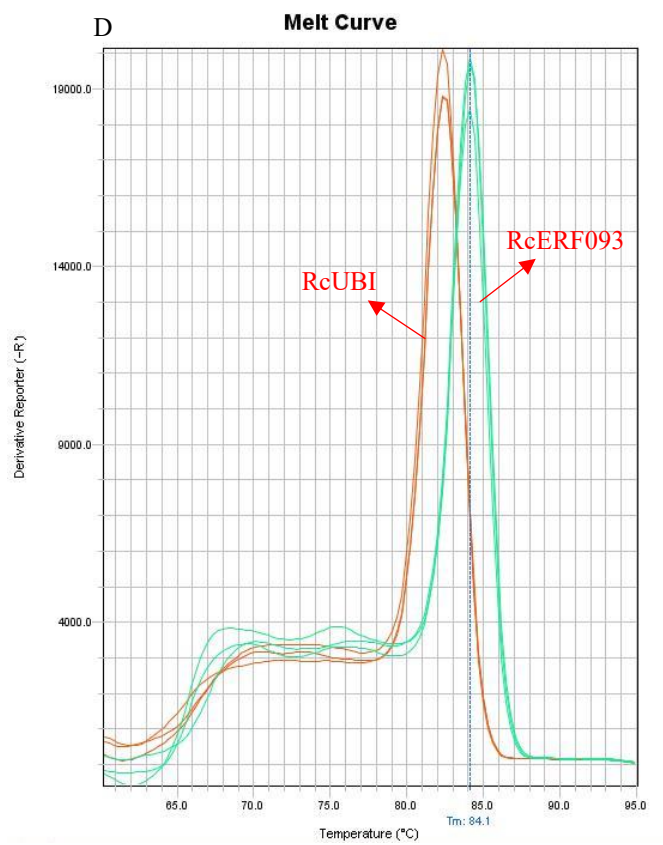

A:30h-PDB

B: 30h-BC

C: 48h-PDB

D:30h-BC

Supplemental Figure S1 Melting curves for each gene and control: RcERF099

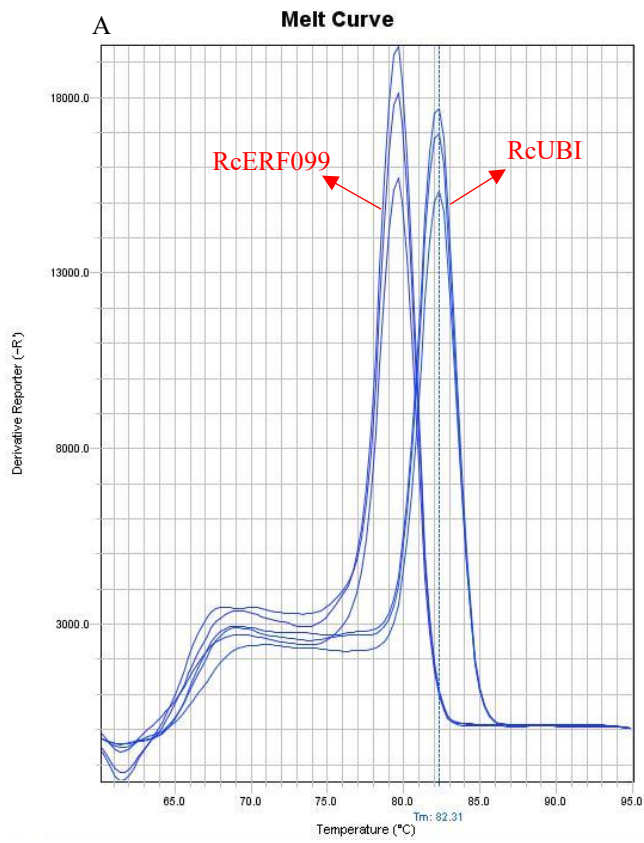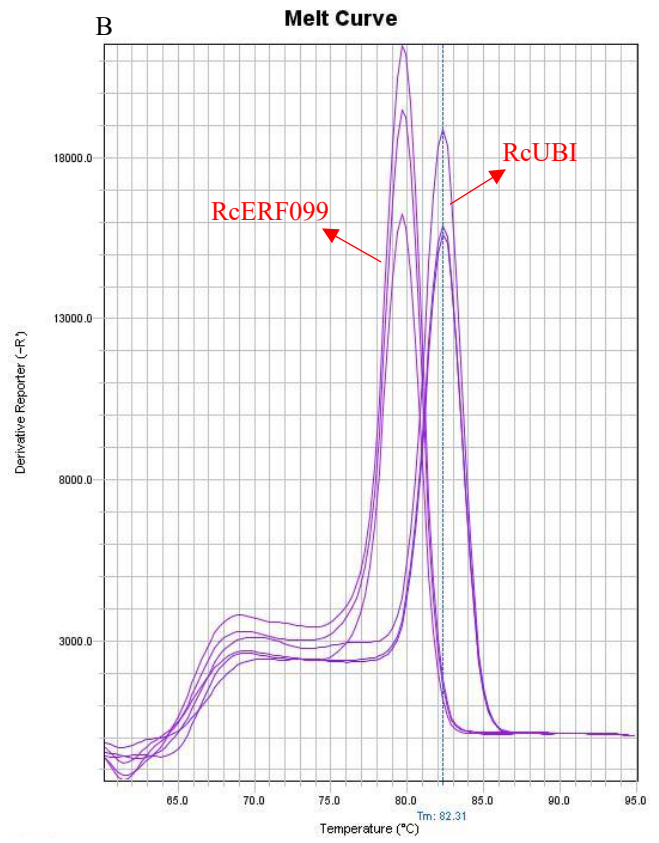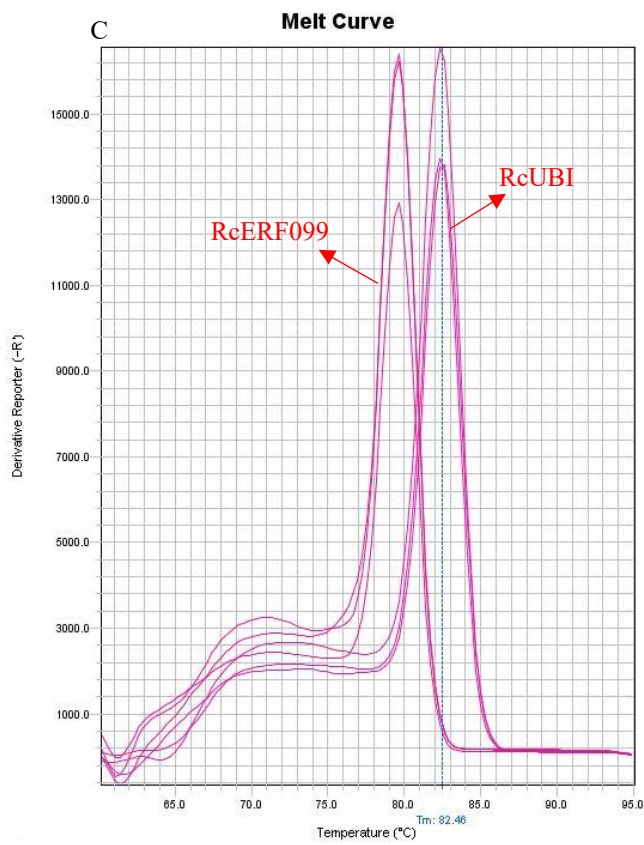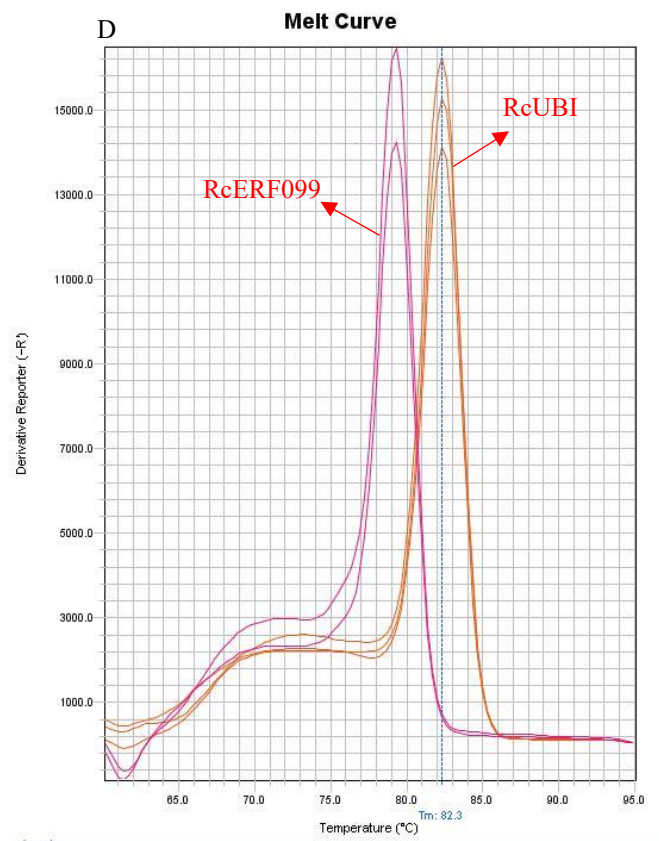

A:30h-PDB

B: 30h-BC

C: 48h-PDB

D:30h-BC

Supplemental Figure S1 Melting curves for each gene and control: RcERF125

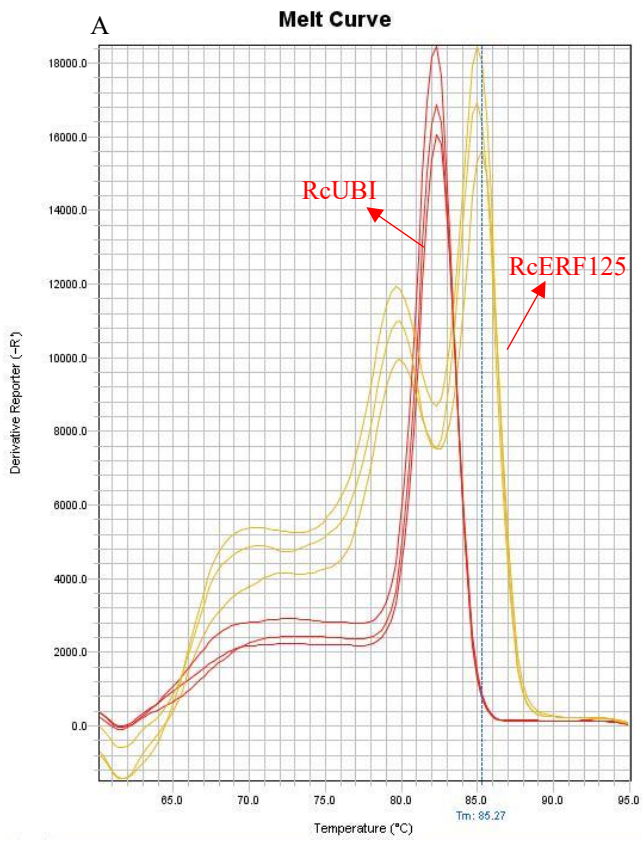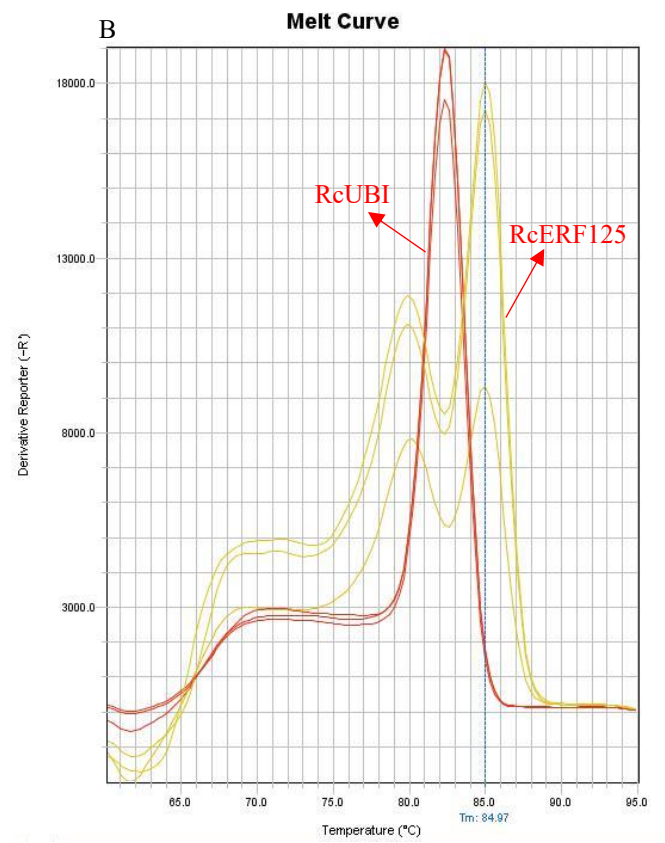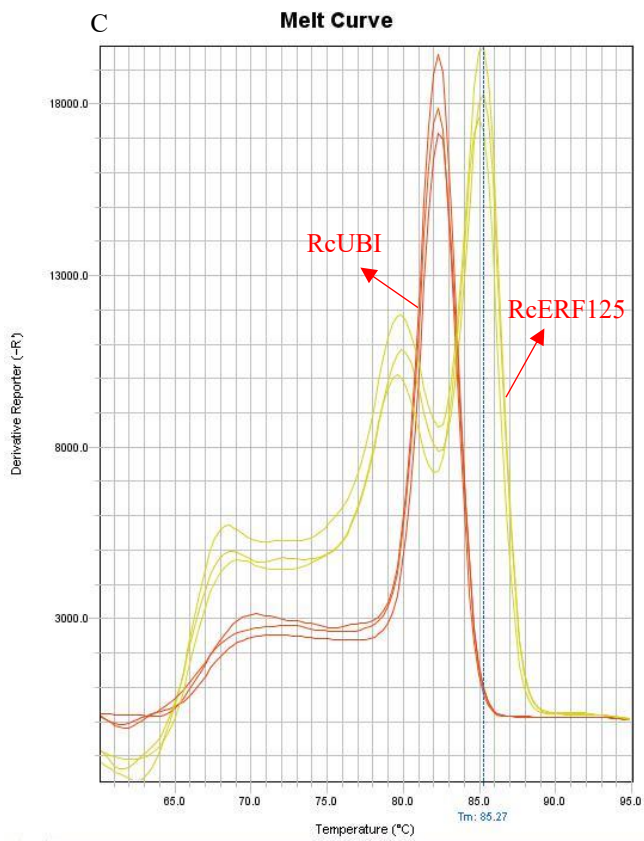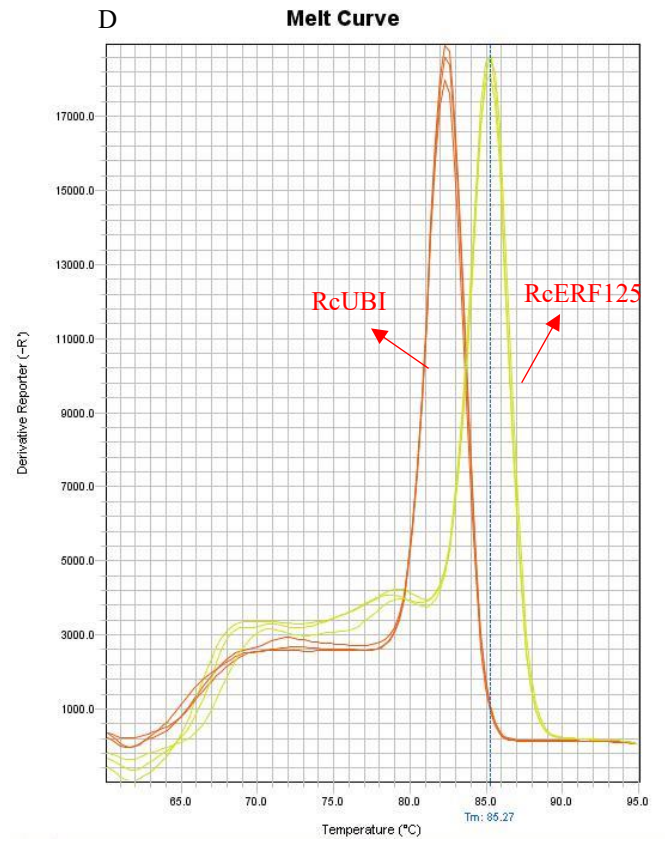

A:30h-PDB

B: 30h-BC

C: 48h-PDB

D:30h-BC
